# Supplementary material for: Proof-of-principle neural network models for classification, attribution, creation, style-mixing, and morphing of image data for genetic conditions
Source: bioRxiv or medRxiv preprint supplement (doi:10.1101/2021.04.08.21255123), 2021-04-10
Supplement: Supplementary file [file media-9.pdf]

**BMJ PUBLISHING GROUP LTD. LICENSE  
TERMS AND CONDITIONS**

Mar 28, 2021

---

---

This Agreement between Benjamin Solomon ("You") and BMJ Publishing Group Ltd. ("BMJ Publishing Group Ltd.") consists of your license details and the terms and conditions provided by BMJ Publishing Group Ltd. and Copyright Clearance Center.

License Number 5037700979686

License date Mar 28, 2021

Licensed Content  
Publisher BMJ Publishing Group Ltd.Licensed Content  
Publication BMJ Case Reports

Licensed Content Title Hypomelanosis of Ito: streaks and whorls

Licensed Content  
Author Daisy Khera,Saurabh Singh,Priya Gupta

Licensed Content Date Apr 1, 2019

Licensed Content  
Volume 12

Licensed Content Issue 4

Type of Use Journal/Magazine

Requestor type Government/Public Sector

Format Print and electronic

|                                      |                                                                                                                                        |
|--------------------------------------|----------------------------------------------------------------------------------------------------------------------------------------|
| Portion                              | Figure/table/extract                                                                                                                   |
| Number of figure/table/extracts      | 1                                                                                                                                      |
| Description of figure/table/extracts | Figure 1                                                                                                                               |
| Will you be translating?             | No                                                                                                                                     |
| Circulation/distribution             | 100000                                                                                                                                 |
| Order reference number               | 12                                                                                                                                     |
| Title of new article                 | A proof-of-principle neural network model for classification, attribution, creation, and morphing of image data for genetic conditions |
| Lead author                          | Benjamin Solomon                                                                                                                       |
| Title of targeted journal            | medRxiv                                                                                                                                |
| Publisher                            | Cold Spring Harbor Laboratory                                                                                                          |
| Expected publication date            | Apr 2021                                                                                                                               |
| Order reference number               | 12                                                                                                                                     |
| Portions                             | Figure 1                                                                                                                               |
| Requestor Location                   | Benjamin Solomon<br>Building 35, Room 1B-207<br>National Institutes of Health<br>MSC 3717<br>Bethesda, MD 20892                        |

United States  
Attn: Benjamin Solomon

Publisher Tax ID GB674738491

Total 0.00 USD

## Terms and Conditions

### BMJ Group Terms and Conditions for Permissions

When you submit your order you are subject to the terms and conditions set out below. You will also have agreed to the Copyright Clearance Center's ("CCC") terms and conditions regarding billing and payment <https://s100.copyright.com/App/PaymentTermsAndConditions.jsp>. CCC are acting as the BMJ Publishing Group Limited's ("BMJ Group's") agent.

Subject to the terms set out herein, the BMJ Group hereby grants to you (the Licensee) a non-exclusive, non-transferable licence to re-use material as detailed in your request for this/those purpose(s) only and in accordance with the following conditions:

1) **Scope of Licence:** Use of the Licensed Material(s) is restricted to the ways specified by you during the order process and any additional use(s) outside of those specified in that request, require a further grant of permission.

2) **Acknowledgement:** In all cases, due acknowledgement to the original publication with permission from the BMJ Group should be stated adjacent to the reproduced Licensed Material. The format of such acknowledgement should read as follows:

"Reproduced from [publication title, author(s), volume number, page numbers, copyright notice year] with permission from BMJ Publishing Group Ltd."

3) **Third Party Material:** BMJ Group acknowledges to the best of its knowledge, it has the rights to licence your reuse of the Licensed Material, subject always to the caveat that images/diagrams, tables and other illustrative material included within, which have a separate copyright notice, are presumed as excluded from the licence. Therefore, you should ensure that the Licensed Material you are requesting is original to BMJ Group and does not carry the copyright of another entity (as credited in the published version). If the credit line on any part of the material you have requested in any way indicates that it was reprinted or adapted by BMJ Group with permission from another source, then you should seek permission from that source directly to re-use the Licensed Material, as this is outside of the licence granted herein.

4) **Altering/Modifying Material:** The text of any material for which a licence is granted may not be altered in any way without the prior express permission of the BMJ Group. Subject to Clause 3 above however, single figure adaptations do not require BMJ Group's approval; however, the adaptation should be credited as follows:

"Adapted by permission from BMJ Publishing Group Limited. [publication title, author, volume number, page numbers, copyright notice year]"

5) **Reservation of Rights:** The BMJ Group reserves all rights not specifically granted in the combination of (i) the licence details provided by you and accepted in the course of this licensing transaction, (ii) these terms and conditions and (iii) CCC's Billing and Payment Terms and Conditions.

6) **Timing of Use:** First use of the Licensed Material must take place within 12 months of the grant of permission.

7). **Creation of Contract and Termination:** Once you have submitted an order via Rightslink and this is received by CCC, and subject to you completing accurate details of your proposed use, this is when a binding contract is in effect and our acceptance occurs. As you are ordering rights from a periodical, to the fullest extent permitted by law, you will have no right to cancel the contract from this point other than for BMJ Group's material breach or fraudulent misrepresentation or as otherwise permitted under a statutory right. Payment must be made in accordance with CCC's Billing and Payment Terms and conditions. In the event that you breach any material condition of these terms and condition or any of CCC's Billing and Payment Terms and Conditions, the license is automatically terminated upon written notice from the BMJ Group or CCC or as otherwise provided for in CCC's Billing and Payment Terms and Conditions, where these apply. Continued use of materials where a license has been terminated, as well as any use of the Licensed Materials beyond the scope of an unrevoked license, may constitute intellectual property rights infringement and BMJ Group reserves the right to take any and all action to protect its intellectual property rights in the Licensed Materials.

8. **Warranties:** BMJ Group makes no express or implied representations or warranties with respect to the Licensed Material and to the fullest extent permitted by law this is provided on an "as is" basis. For the avoidance of doubt BMJ Group does not warrant that the Licensed Material is accurate or fit for any particular purpose.

9. **Limitation of Liability:** To the fullest extent permitted by law, the BMJ Group disclaims all liability for any indirect, consequential or incidental damages (including without limitation, damages for loss of profits, information or interruption) arising out of the use or inability to use the Licensed Material or the inability to obtain additional rights to use the Licensed Material. To the fullest extent permitted by law, the maximum aggregate liability of the BMJ Group for any claims, costs, proceedings and demands for direct losses caused by BMJ Group's breaches of its obligations herein shall be limited to twice the amount paid by you to CCC for the license granted herein.

10. **Indemnity:** You hereby indemnify and hold harmless the BMJ Group and their respective officers, directors, employees and agents, from and against any and all claims, costs, proceeding or demands arising out of your unauthorized use of the Licensed Material.

11. **No Transfer of License:** This license is personal to you, and may not be assigned or transferred by you without prior written consent from the BMJ Group or its authorized agent(s). BMJ Group may assign or transfer any of its rights and obligations under this Agreement, upon written notice to you.

12. **No Amendment Except in Writing:** This license may not be amended except in a writing signed by both parties (or, in the case of BMJ Group, by CCC on the BMJ Group's behalf).

13. **Objection to Contrary terms:** BMJ Group hereby objects to any terms contained in any purchase order, acknowledgment, check endorsement or other writing prepared by you, which terms are inconsistent with these terms and conditions or CCC's Billing and Payment Terms and Conditions. These terms and conditions, together with CCC's Billing and Payment Terms and Conditions (which to the extent they are consistent are incorporated herein), comprise the entire agreement between you and BMJ Group (and CCC) and the Licensee concerning this licensing transaction. In the event of any conflict between your obligations established by these terms and conditions and those established by CCC's Billing and Payment Terms and Conditions, these terms and conditions shall control.

14. **Revocation:** BMJ Group or CCC may, within 30 days of issuance of this license, deny the permissions described in this license at their sole discretion, for any reason or no reason, with a full refund payable to you should you have not been able to exercise your rights in full. Notice of such denial will be made using the contact information provided by you. Failure to receive such notice from BMJ Group or CCC will not, to the fullest extent permitted by law alter or invalidate the denial. For the fullest extent permitted by law in no event will BMJ Group or CCC be responsible or liable for any costs, expenses or damage incurred by you as a result of a denial of your permission

request, other than a refund of the amount(s) paid by you to BMJ Group and/or CCC for denied permissions.

**15. Restrictions to the license:**

**15.1 Promotion:** BMJ Group will not give permission to reproduce in full or in part any Licensed Material for use in the promotion of the following:

a) non-medical products that are harmful or potentially harmful to health: alcohol, baby milks and/or, sunbeds

b) medical products that do not have a product license granted by the Medicines and Healthcare Regulatory Agency (MHRA) or its international equivalents. Marketing of the product may start only after data sheets have been released to members of the medical profession and must conform to the marketing authorization contained in the product license.

**16. Translation:** This permission is granted for non-exclusive world English language rights only unless explicitly stated in your licence. If translation rights are granted, a professional translator should be employed and the content should be reproduced word for word preserving the integrity of the content.

**17. General:** Neither party shall be liable for failure, default or delay in performing its obligations under this Licence, caused by a Force Majeure event which shall include any act of God, war, or threatened war, act or threatened act of terrorism, riot, strike, lockout, individual action, fire, flood, drought, tempest or other event beyond the reasonable control of either party.

17.1 In the event that any provision of this Agreement is held to be invalid, the remainder of the provisions shall continue in full force and effect.

17.2 There shall be no right whatsoever for any third party to enforce the terms and conditions of this Agreement. The Parties hereby expressly wish to exclude the operation of the Contracts (Rights of Third Parties) Act 1999 and any other legislation which has this effect and is binding on this agreement.

17.3 To the fullest extent permitted by law, this Licence will be governed by the laws of England and shall be governed and construed in accordance with the laws of England. Any action arising out of or relating to this agreement shall be brought in courts situated in England save where it is necessary for BMJ Group for enforcement to bring proceedings to bring an action in an alternative jurisdiction.

**Questions? [customercare@copyright.com](mailto:customercare@copyright.com) or +1-855-239-3415 (toll free in the US) or +1-978-646-2777.**
